# Supplementary material
Source: MDPI journal article supplement (https://www.mdpi.com/2313-0105/8/7/67)
Supplement: s1 [file s1]

## Supplementary Materials

### Microwave-assisted hydrothermal synthesis of space fillers to enhance volumetric energy density of NMC811 cathode material for Li-ion batteries

*Irina A. Skvortsova, Aleksandra A. Savina, Elena D. Orlova, Vladislav S. Gorshkov, Artem M. Abakumov*

Center for Energy Science and Technology, Skolkovo Institute of Science and Technology,  
Nobel str. 3, 121205 Moscow

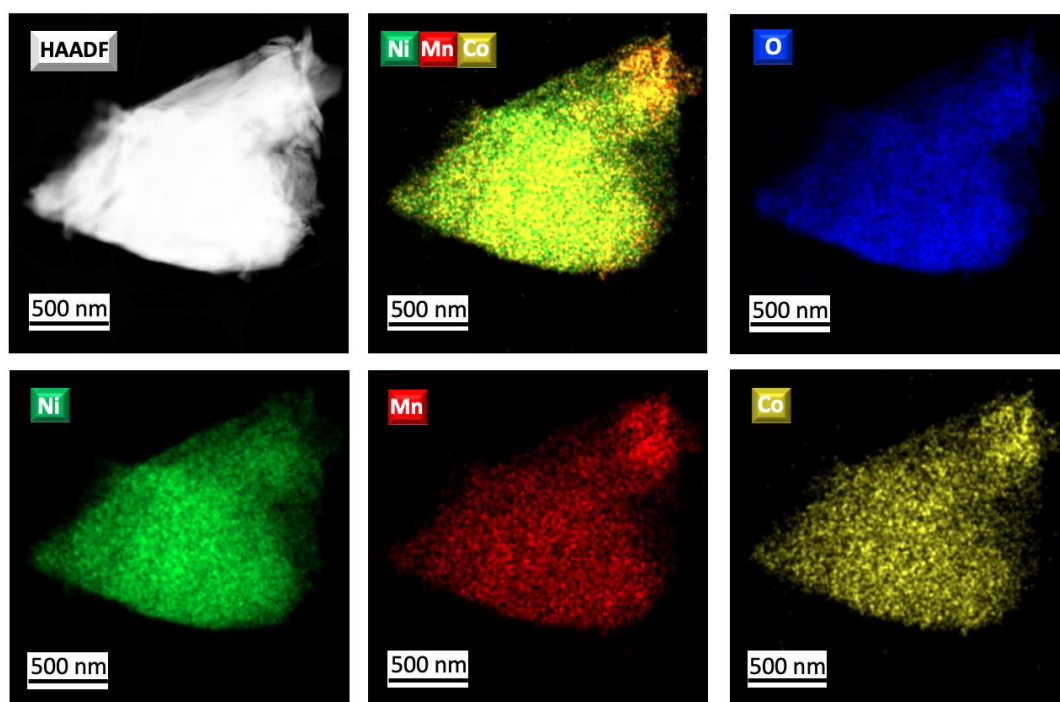

**Figure S1.** Typical HAADF-STEM images of the  $\text{Ni}_{0.8}\text{Mn}_{0.1}\text{Co}_{0.1}(\text{OH})_2$  precursor obtained via a microwave-assisted hydrothermal route with low glycine concentration (TM:Gly molar ratio of 1:12.35) along with color-coded STEM-EDX compositional map and elemental maps of O, Ni, Mn, and Co.

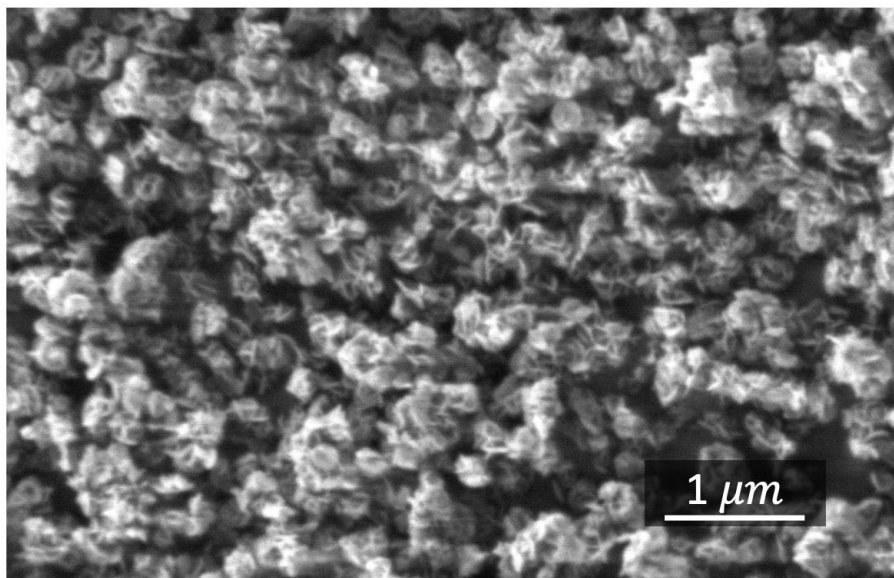

**Figure S2.** SEM image of  $\text{Ni}_{0.8}\text{Mn}_{0.1}\text{Co}_{0.1}(\text{OH})_2$  sample obtained using a microwave-assisted hydrothermal route with low NaOH concentration (TM:NaOH molar ratio of 1:20).

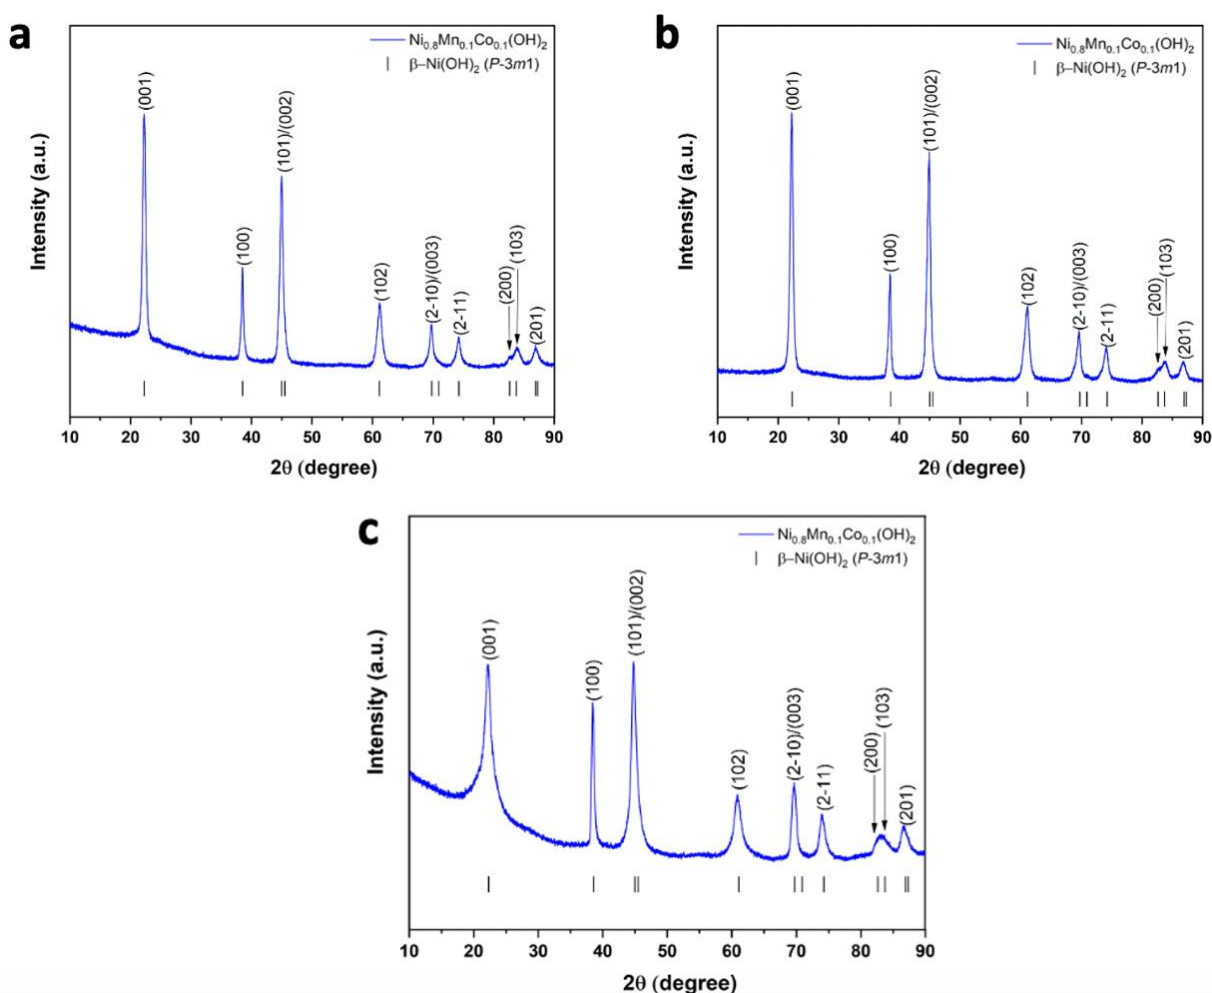

**Figure S3.** Powder XRD patterns (blue curve) for the  $\text{Ni}_{0.8}\text{Mn}_{0.1}\text{Co}_{0.1}(\text{OH})_2$  precursors MW\_15m ( $a = 3.125(1) \text{ \AA}$ ,  $c = 4.619(2) \text{ \AA}$ ) (a), MW\_60m ( $a = 3.131(5) \text{ \AA}$ ,  $c = 4.615(1) \text{ \AA}$ ) (b) and CP ( $a = 3.115(3) \text{ \AA}$ ,  $c = 4.614(1) \text{ \AA}$ ) (c). Bragg reflection positions for the  $\beta\text{-Ni}(\text{OH})_2$  structure are marked with black vertical lines.

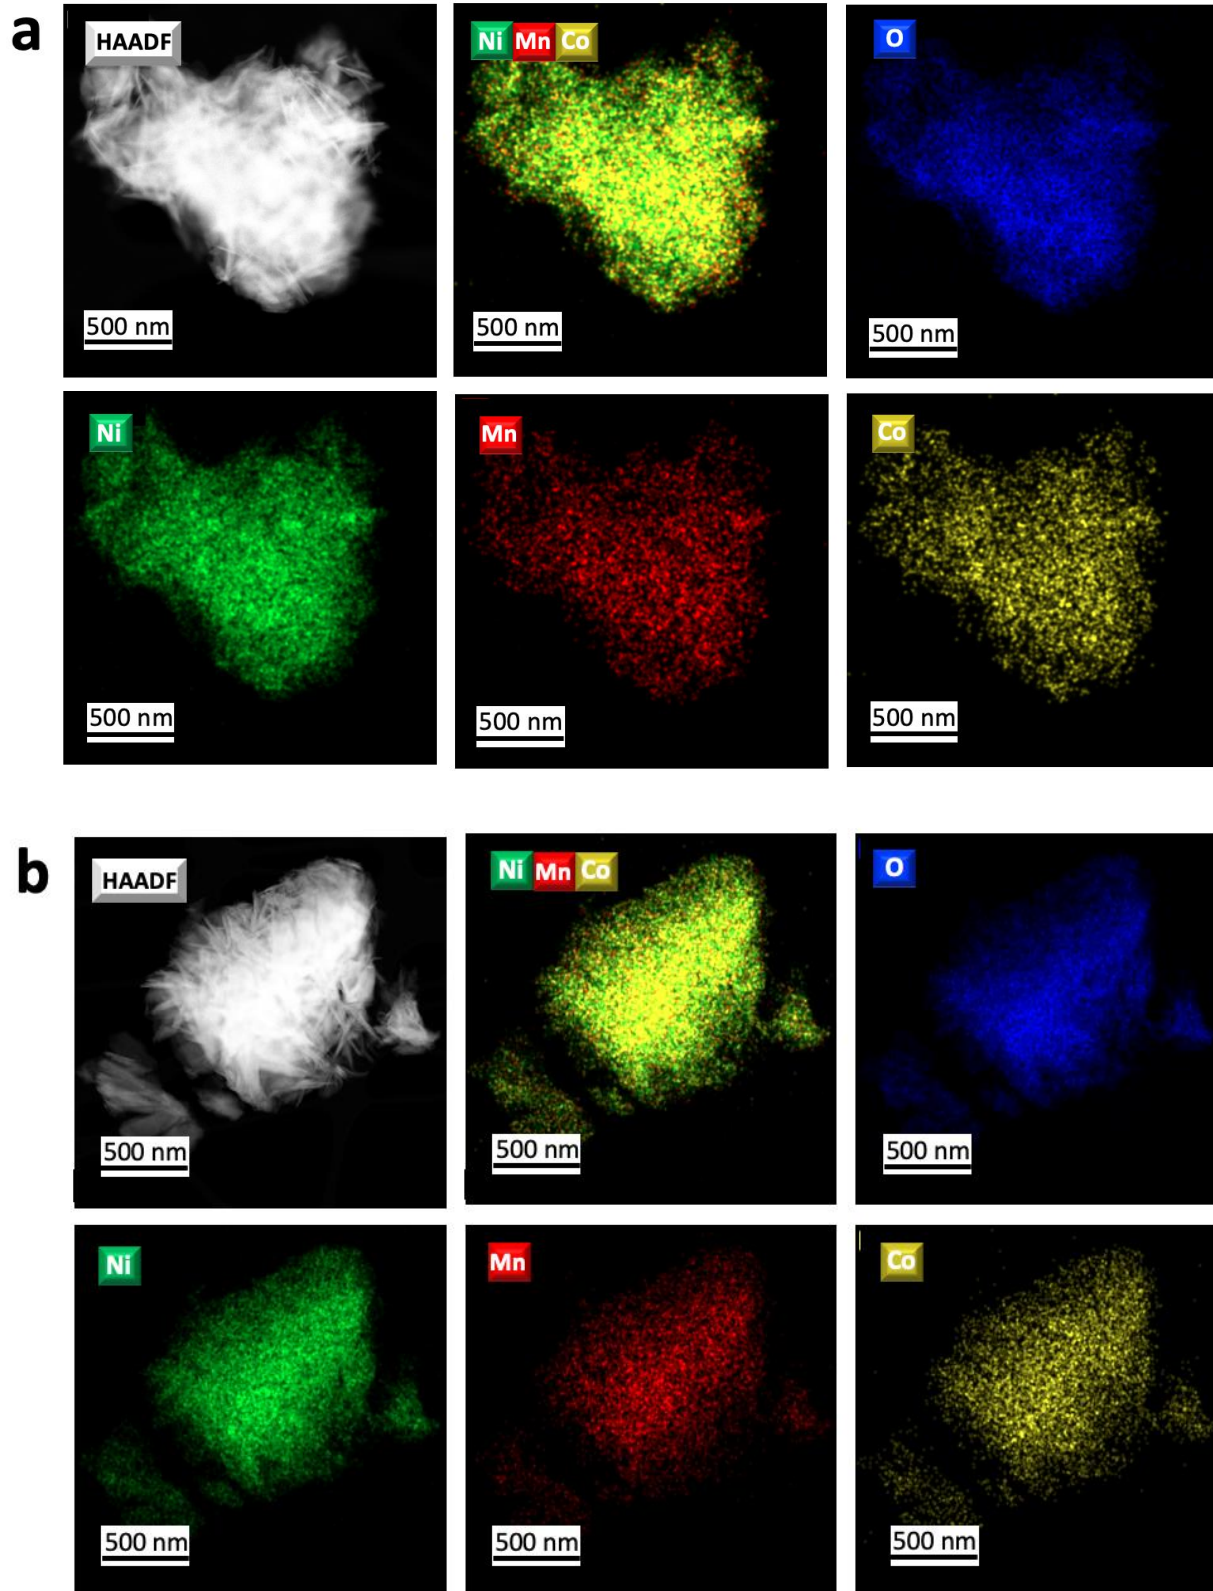

**Figure S4.** HAADF-STEM images of the MW\_15m (a) and MW\_60m (b) hydroxide precursors along with the corresponding color-coded STEM-EDX compositional maps and elemental maps of O, Ni, Mn, and Co.

**Table S1.** Quantitative EDX analysis for the  $\text{Ni}_{0.8}\text{Mn}_{0.1}\text{Co}_{0.1}(\text{OH})_2$  precursors.

| Sample | Ni, mol. fraction | Mn, mol. fraction | Co, mol. fraction |
|--------|-------------------|-------------------|-------------------|
| MW_15m | $0.810 \pm 0.012$ | $0.110 \pm 0.023$ | $0.080 \pm 0.019$ |
| MW_30m | $0.798 \pm 0.022$ | $0.086 \pm 0.016$ | $0.116 \pm 0.011$ |
| MW_60m | $0.796 \pm 0.020$ | $0.084 \pm 0.015$ | $0.120 \pm 0.021$ |

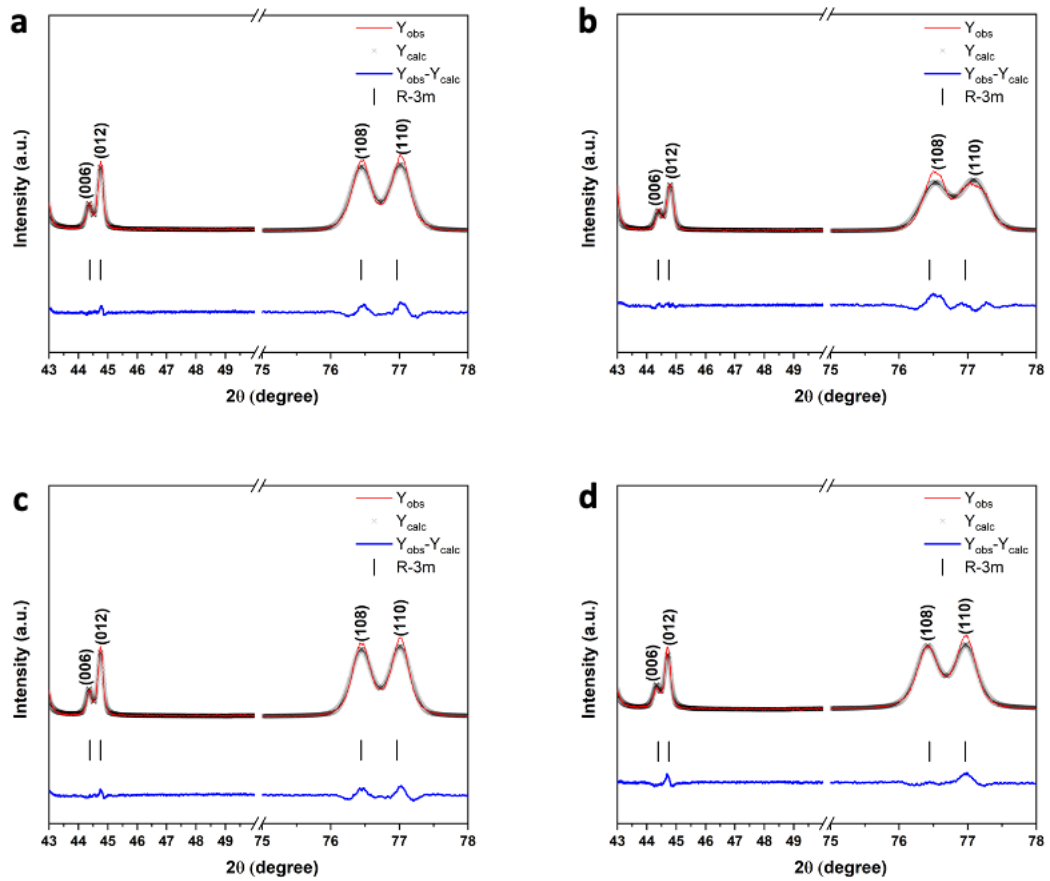**Figure S5.** Splitting of (006)/(012) and (108)/(110) peaks on experimental (black), calculated (red), and difference (blue) powder XRD patterns of the MW\_15m\_A (a), MW\_30m\_A (b), MW\_60m\_A (c) and CP\_A (d) samples after Rietveld refinement. Bragg reflection positions (sp. gr.  $R\bar{3}m$ ) are marked with black vertical lines.



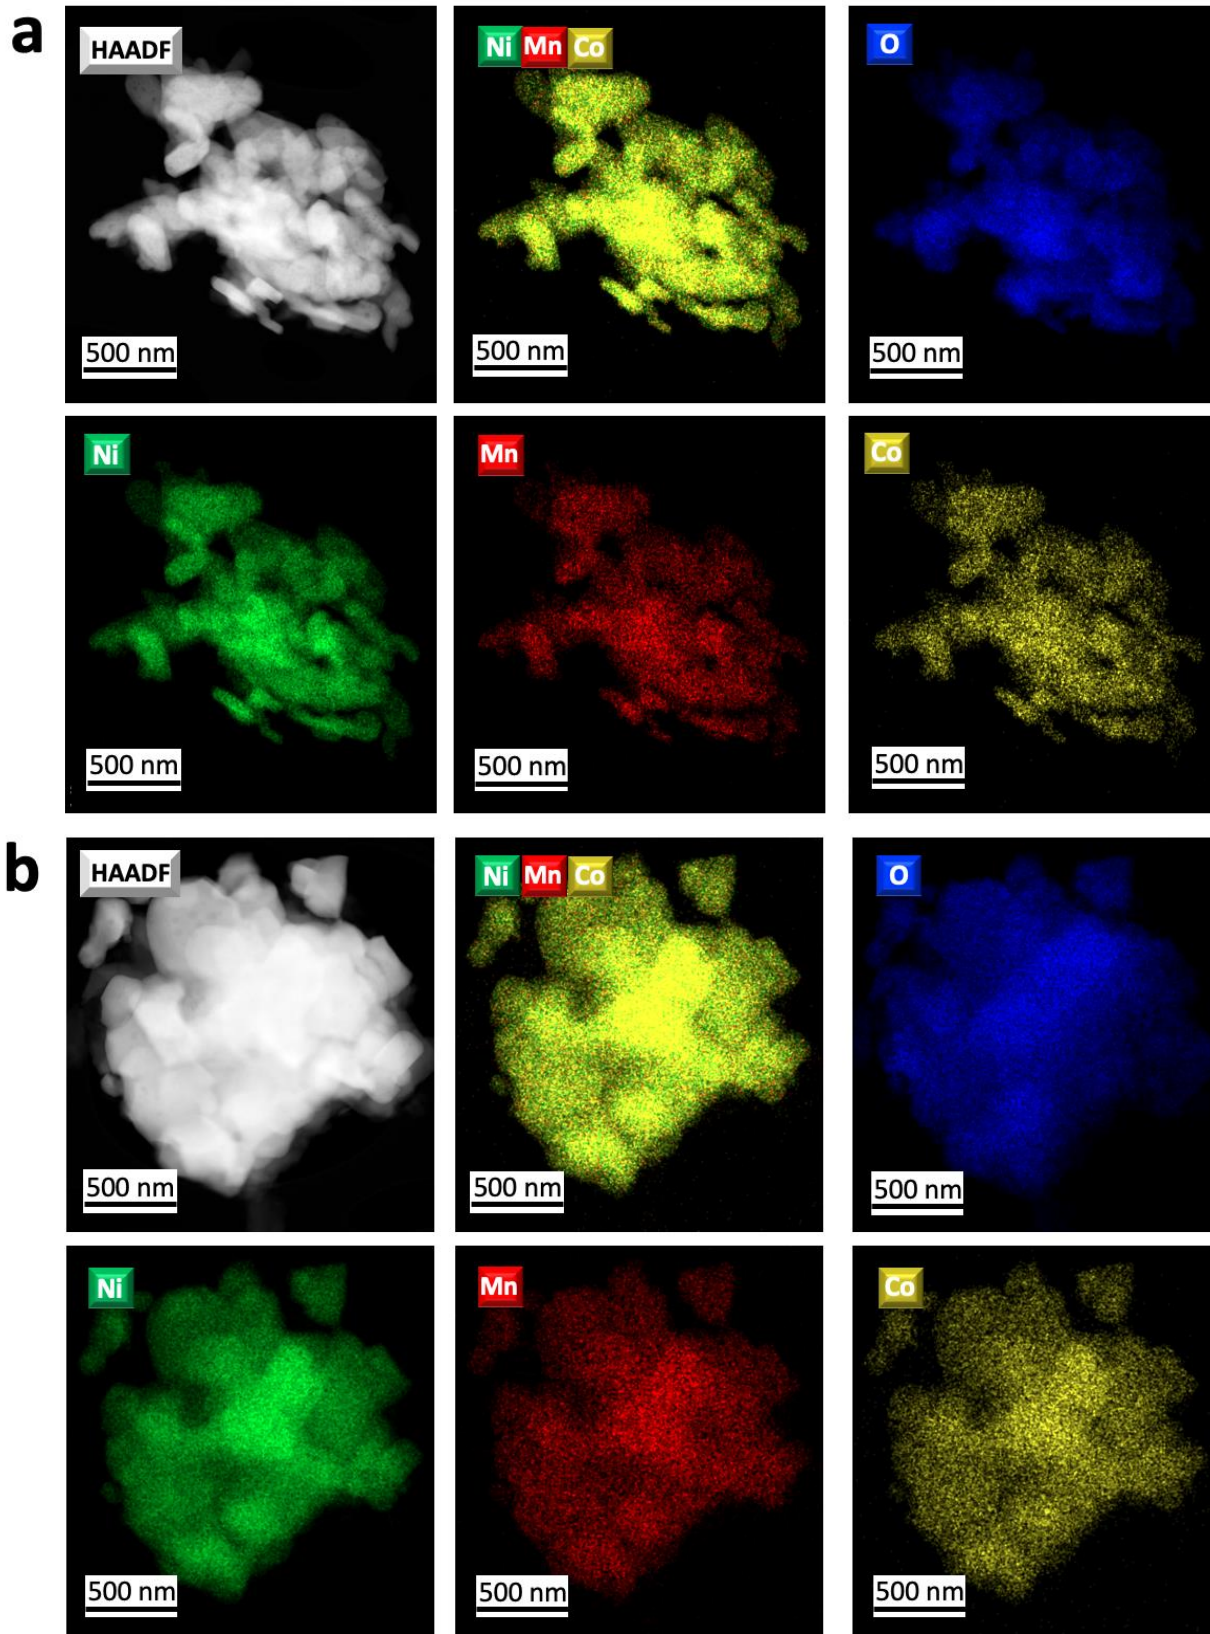

**Figure S6.** HAADF-STEM images of the MW\_15m\_A (a) and MW\_60m\_A (b) NMC811 samples along with the corresponding color-coded STEM-EDX compositional maps and elemental maps of O, Ni, Mn, and Co.

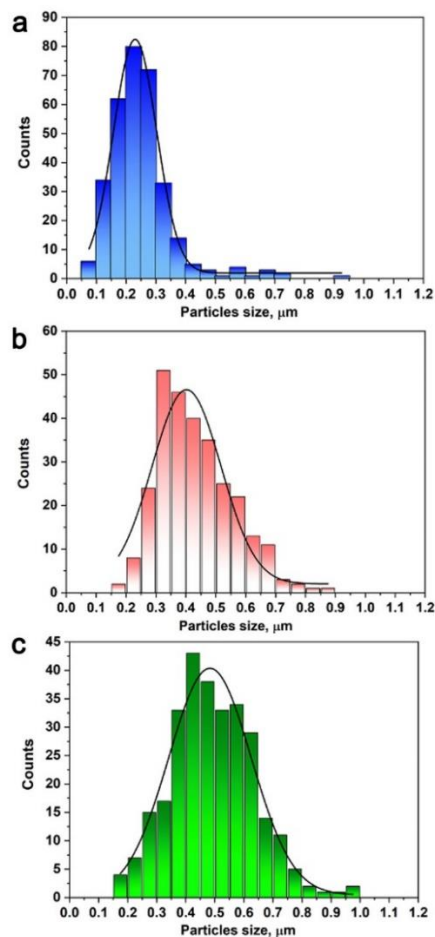

**Figure S7.** Size distributions of the primary particles in the NMC811 samples MW\_15m\_A (a), MW\_30m\_A (b), and MW\_60m\_A (c).

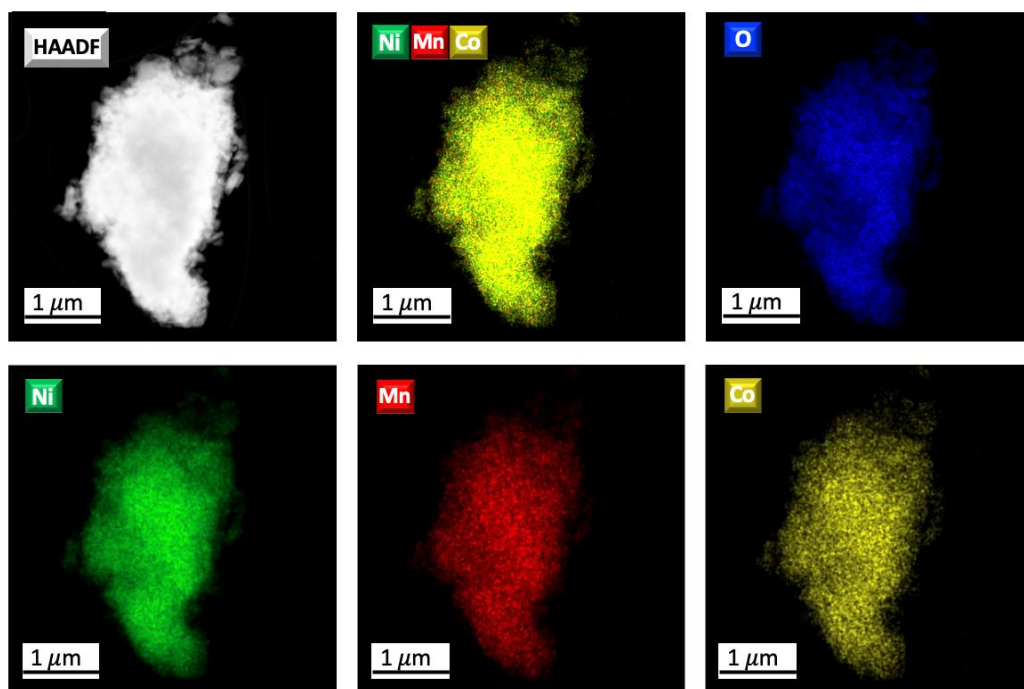

**Figure S8.** HAADF-STEM image of the CP\_A NMC811 sample obtained through coprecipitation route along with the color-coded STEM-EDX compositional map and elemental maps of O, Ni, Mn, and Co.

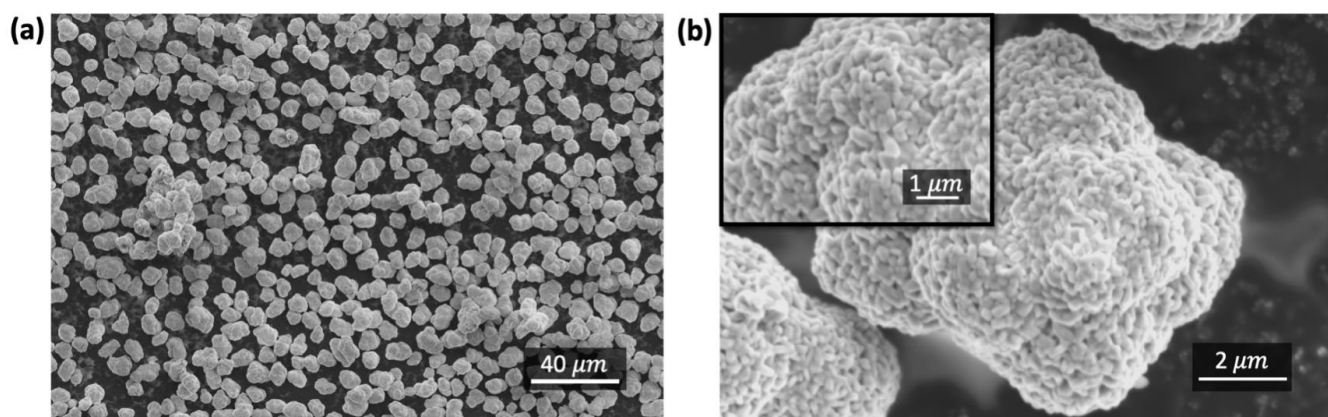

**Figure S9.** SEM images of the CP\_A NMC811 sample obtained through co-precipitation.

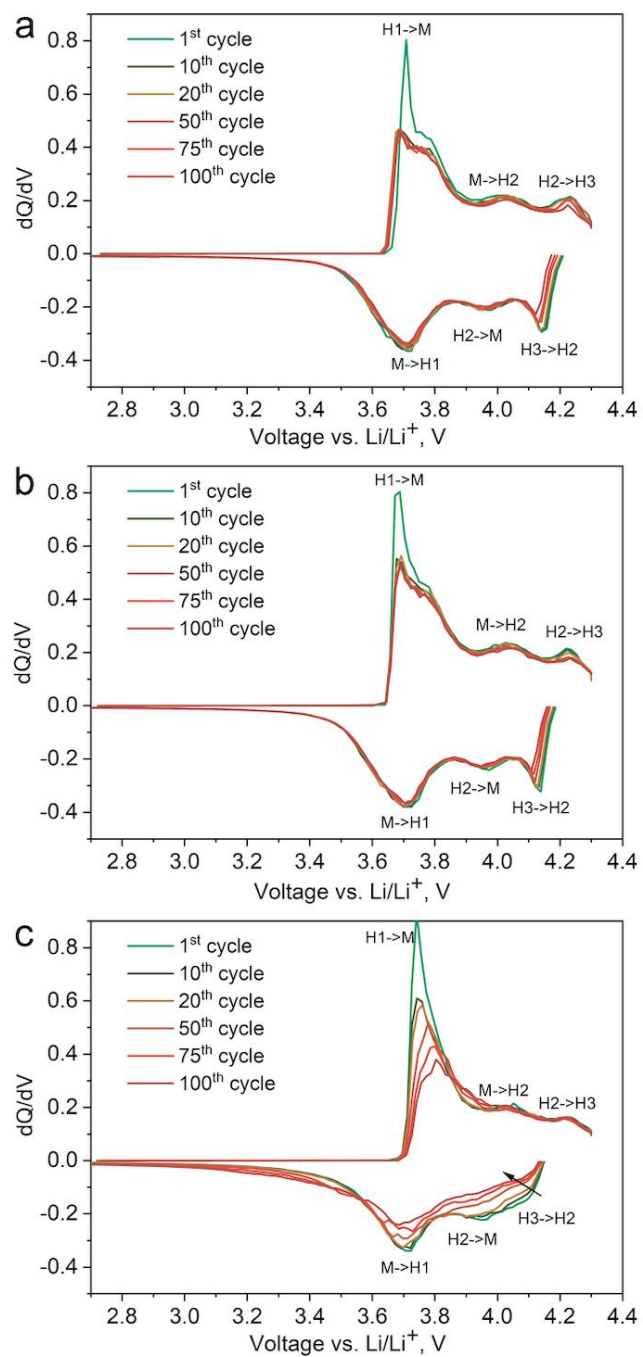

**Figure S10.** Differential capacity plots for the NMC811 MW\_15m\_A (a), MW\_30m\_A (b), and MW\_60m\_A (c) samples.



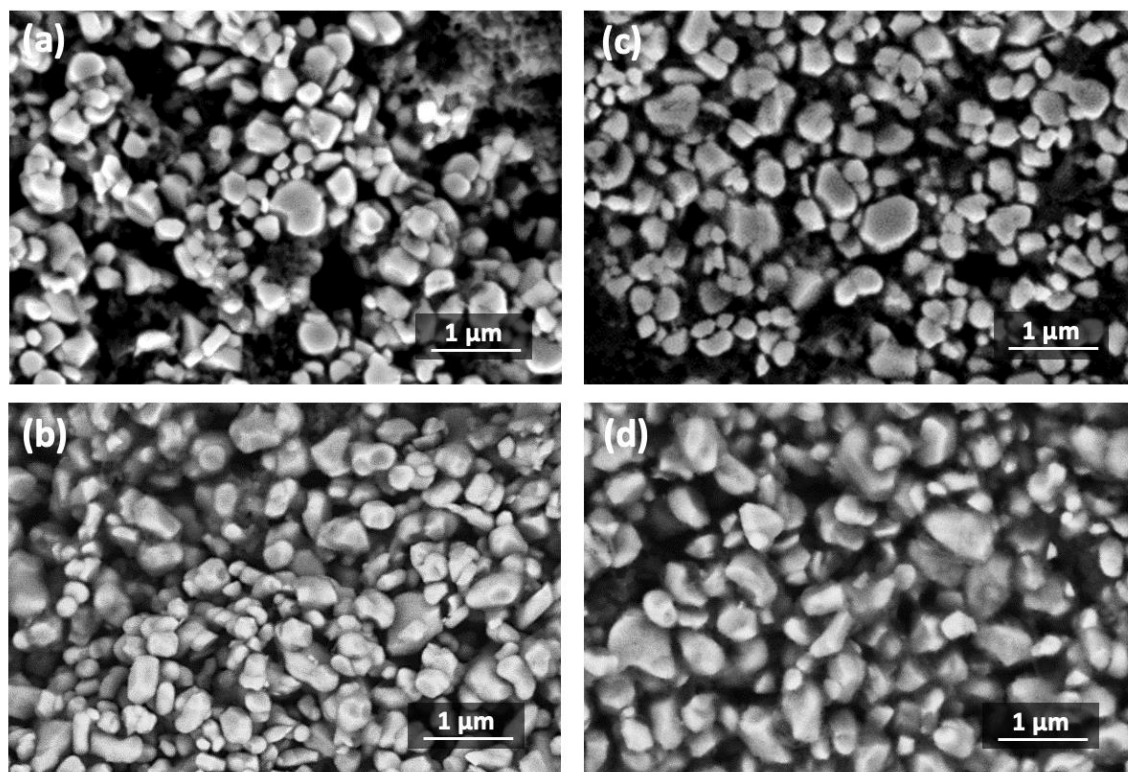

**Figure S11.** SEM images of the pristine (a,b) and 330 times cycled (c, d) NMC811 electrodes of the MW\_15m\_A (a,c) and MW\_30m\_A (b, d) samples.

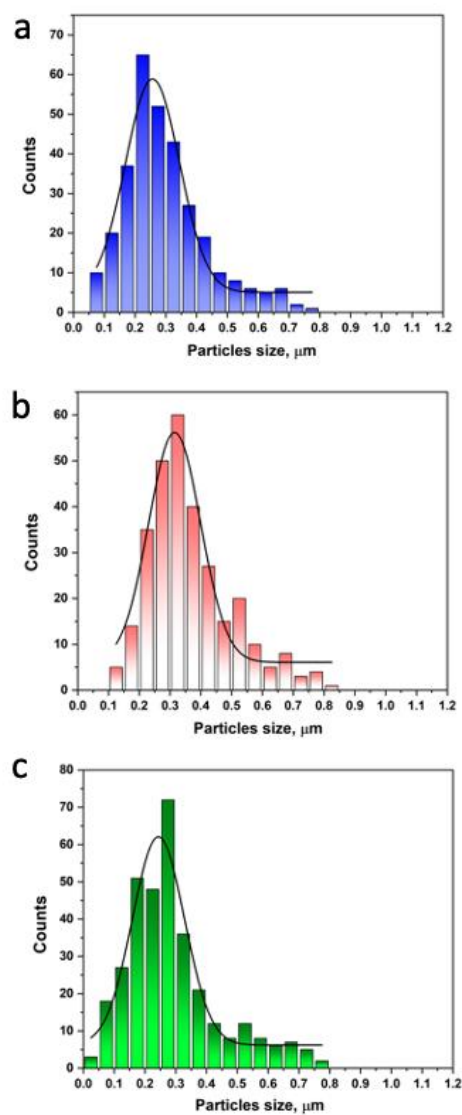

**Figure S12.** Size distributions of the primary particles in the NMC811 electrodes MW\_15m\_A (a), MW\_30m\_A (b), and MW\_60m\_A (c) after 330 charge/discharge cycles.

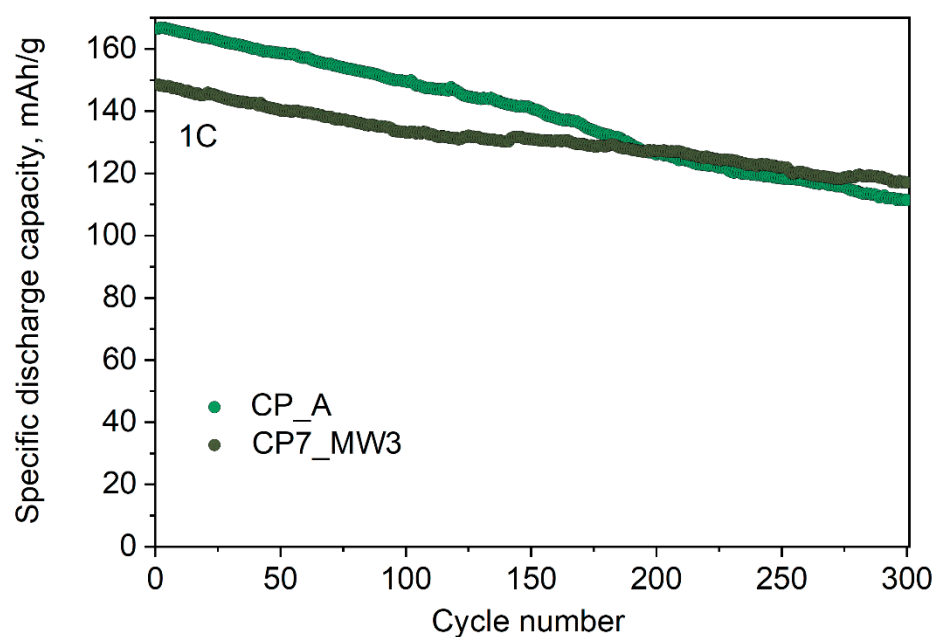

**Figure S13.** Capacity retention at 1C rate of the CP\_A and CP7\_MW3 NMC811 samples in half-cells with metallic lithium anode.

**Table S2.** The results of EIS spectra approximation by a selected equivalent circuit.

|                    |                 |                                     |                                     |                                |                                |                                    |                               |                               |
|--------------------|-----------------|-------------------------------------|-------------------------------------|--------------------------------|--------------------------------|------------------------------------|-------------------------------|-------------------------------|
| <i>CP7_MW3</i>     |                 | <b><math>R_{sol}, \Omega</math></b> | <b><math>R_{SEI}, \Omega</math></b> | <b><math>C_{SEI}, F</math></b> | <b><math>\phi_{SEI}</math></b> | <b><math>R_{ct}, \Omega</math></b> | <b><math>C_{dl}, F</math></b> | <b><math>\phi_{dl}</math></b> |
|                    | <b>Value</b>    | 0                                   | 34.33                               | $1.06 \cdot 10^{-5}$           | 0.91                           | 67.89                              | $9.61 \cdot 10^{-4}$          | 0.83                          |
|                    | <b>Accuracy</b> | 0                                   | 0.69%                               | 2.89%                          | 0.38%                          | 0.45%                              | 1.40%                         | 0.41%                         |
| <i>CP7_MW30m_A</i> |                 | <b><math>R_{sol}, \Omega</math></b> | <b><math>R_{SEI}, \Omega</math></b> | <b><math>C_{SEI}, F</math></b> | <b><math>\phi_{SEI}</math></b> | <b><math>R_{ct}, \Omega</math></b> | <b><math>C_{dl}, F</math></b> | <b><math>\phi_{dl}</math></b> |
|                    | <b>Value</b>    | 0                                   | 29.49                               | $1.13 \cdot 10^{-5}$           | 0.80                           | 48.18                              | $3.04 \cdot 10^{-3}$          | 0.83                          |
|                    | <b>Accuracy</b> | 0                                   | 1.04%                               | 4.40%                          | 0.58%                          | 0.70%                              | 1.69%                         | 0.31%                         |
| <i>CP_A</i>        |                 | <b><math>R_{sol}, \Omega</math></b> | <b><math>R_{SEI}, \Omega</math></b> | <b><math>C_{SEI}, F</math></b> | <b><math>\phi_{SEI}</math></b> | <b><math>R_{ct}, \Omega</math></b> | <b><math>C_{dl}, F</math></b> | <b><math>\phi_{dl}</math></b> |

|  |                 |       |       |                      |       |       |                      |       |
|--|-----------------|-------|-------|----------------------|-------|-------|----------------------|-------|
|  | <b>Value</b>    | 1.04  | 14.22 | $1.43 \cdot 10^{-5}$ | 0.90  | 85.82 | $1.87 \cdot 10^{-3}$ | 0.86  |
|  | <b>Accuracy</b> | 0.66% | 0.36% | 2.54%                | 0.27% | 0.59% | 1.05%                | 0.38% |
